# Supplementary material for: Additive-Free Method for Enhancing the Volume Phase Transition Rate in Light-Responsive Hydrogels: A Study of Micro-Nano Bubble Water on PNIPAM-co-AAc Hydrogels
Source: Gels. 2023 Nov 7;9(11):880. doi: 10.3390/gels9110880 (PMC10671373; doi:10.3390/gels9110880)
Supplement: Supplementary file 1 [file gels-09-00880-s001.zip]

Archive with 5 entries (5 files):
- S1 5min.mp4
- S2 30min.mp4
- S3 120min.mp4
- S4 Degassed.mp4
- SI for bubble wate gel.pdf
